# Supplementary material for: Lightweight End-to-End Deep Learning Solution for Estimating the Respiration Rate from Photoplethysmogram Signal
Source: MDPI journal article supplement (doi:10.3390/bioengineering9100558), 2022-10-16
Supplement: s1 [file s1]

## Supplementary Materials

**Supplementary Table S1:** Summary of the current research in estimating RR

| Author                      | Method Used                                       |
|-----------------------------|---------------------------------------------------|
| Nilsson et al. [32]         | Digital Filtering                                 |
| Zhou et al. [33]            | Independent Component Analysis                    |
| Fleming et al. [34]         | Auto-regressive Model                             |
| Karlen et al. [7]           | Fast Fourier Transformation                       |
| Orphanidou et al. [25]      | Auto-regressive Model                             |
| Madhav et al. [35]          | Modified multi scale principal component analysis |
| Mirmohamadsadeh et al. [26] | Instantaneous Frequency Tracking Algorithm        |
| Philip et al. [18]          | Spot Assessment                                   |
| Pimentel et al. [9,36]      | Auto-regressive Model                             |
| Zhang et al. [37,38]        | Joint Sparse Signal Reconstruction                |
| Lin et al. [39]             | Wavelet-Based Algorithm                           |
| Moreno et al. [40]          | Digital Filtering                                 |
| Pirhonen et al. [41]        | Wavelet-Based                                     |
| Jarchi et al. [42]          | Accelerometer Based                               |
| Hartmann et al. [43]        | Fast Fourier Transformation                       |
| Motin et al. [44,45]        | Ensemble Empirical Mode Decomposition             |
| Shuzan et al. [46]          | Classical Machine Learning                        |
| Lampier et al. [47]         | Deep Learning                                     |
| Rathore et al. [48]         | Deep Learning                                     |

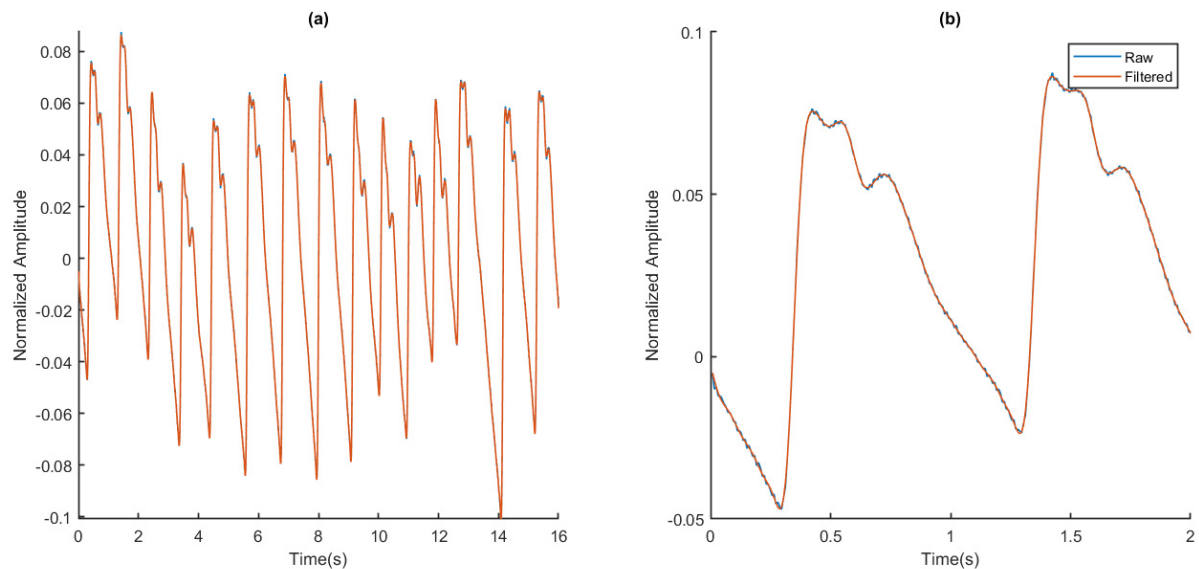

**Supplementary Figure S1:** Applying a low pass filter to remove high-frequency noises. (a) Effect of filter on the whole signal (b) Zooming on 2s data to see the effect of low pass filter

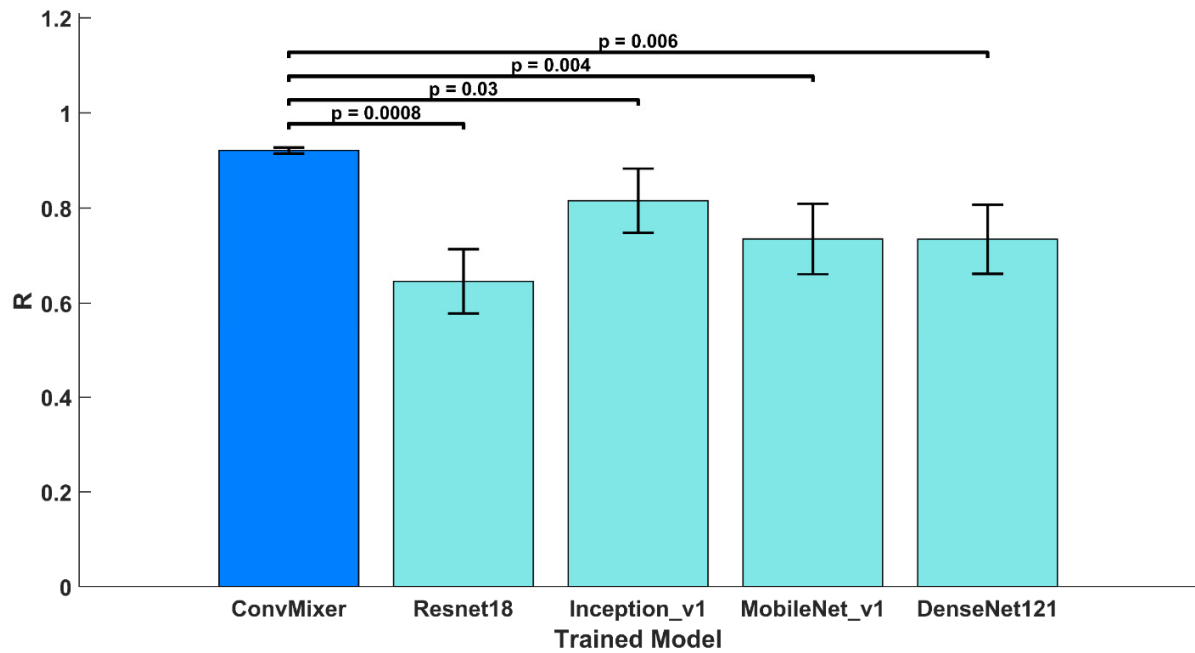

**Supplementary Figure S2:** Paired sample *ttest* results showing that ConvMixer outperformed other models significantly ( $p < 0.05$ ).

**Supplementary Table S2:** Evaluation of Five Convolution Neural Networks using 5-fold cross validation on BIDMC dataset

| Model                   | Parameters (millions) | R                    | MAE (bpm)            | RMSE (bpm)           |
|-------------------------|-----------------------|----------------------|----------------------|----------------------|
| Resnet18                | 0.93                  | 0.7835               | 1.3186               | 1.8709               |
| Inception_v1            | 3.40                  | 0.7957               | 1.3535               | 1.8924               |
| Mobilenet_v1            | 2.01                  | 0.7818               | 1.3510               | 1.8930               |
| Densenet121             | 277.36                | 0.8298               | 1.1219               | 1.6652               |
| <b><u>ConvMixer</u></b> | <b><u>0.56</u></b>    | <b><u>0.9155</u></b> | <b><u>0.7656</u></b> | <b><u>1.2039</u></b> |
